# Supplementary material
Source: publisher site journal article supplement (https://www.dovepress.com/get_supplementary_file.php?f=362536.xlsx)
Supplement: Supplementary file 1 [file get_supplementary_file.php]

## Sheet: Foglio1
Table S1: Complete results from regression analysis measuring association between inflammatory markers and depressive symptoms
Model's p-value	Predictor's p-value	Predictor's coefficient	Predictor's odds ratio	5% (odds ratio C.I.)	95% (odds ratio C.I.)	Predictor	Outcome	Covariate list
0.0881331	0.151466	2.43764				hs-CRP	CDI 2-SR Total score	[Age/sex, SSRI]
0.102878	0.200919	2.19966				hs-CRP	CDI 2-SR Total score	[SSRI]
0.113038	0.194872	2.32152				hs-CRP	CDI 2-SR Total score	[SSRI, SAS]
0.116049	0.0942741	3.41377				hs-CRP	CDI 2-SR Total score	[Age/sex, SSRI, BMI]
0.171052	0.147338	2.91117				hs-CRP	CDI 2-SR Total score	[SSRI, BMI]
0.17572	0.207734	2.54513				hs-CRP	CDI 2-SR Total score	[SSRI, SAS, BMI]
0.185733	0.182236	2.42105				hs-CRP	CDI 2-SR Total score	[Age/sex, SSRI, SAS]
0.199133	0.199133	2.25426				hs-CRP	CDI 2-SR Total score	[]
0.235701	0.142556	3.09436				hs-CRP	CDI 2-SR Total score	[Age/sex, SSRI, SAS, BMI]
0.292141	0.166211	2.44053				hs-CRP	CDI 2-SR Total score	[Age/sex]
0.305513	0.171846	2.5385				hs-CRP	CDI 2-SR Total score	[SAS]
0.326672	0.136846	3.04667				hs-CRP	CDI 2-SR Total score	[BMI]
0.341492	0.102406	3.45564				hs-CRP	CDI 2-SR Total score	[Age/sex, BMI]
0.417412	0.174986	2.83925				hs-CRP	CDI 2-SR Total score	[SAS, BMI]
0.496864	0.168922	2.61194				hs-CRP	CDI 2-SR Total score	[Age/sex, SAS]
0.573476	0.142434	3.2406				hs-CRP	CDI 2-SR Total score	[Age/sex, SAS, BMI]
0.164954	0.661218	0.782373				hs-CRP	CDI 2-SR Depressed mood/somatic symptoms	[SSRI]
0.19254	0.98484	0.0355309				hs-CRP	CDI 2-SR Depressed mood/somatic symptoms	[SSRI, SAS]
0.223591	0.585793	0.975156				hs-CRP	CDI 2-SR Depressed mood/somatic symptoms	[Age/sex, SSRI]
0.233722	0.925788	0.174801				hs-CRP	CDI 2-SR Depressed mood/somatic symptoms	[Age/sex, SSRI, SAS]
0.283705	0.949062	0.134894				hs-CRP	CDI 2-SR Depressed mood/somatic symptoms	[SSRI, SAS, BMI]
0.292435	0.698159	0.845079				hs-CRP	CDI 2-SR Depressed mood/somatic symptoms	[Age/sex, SSRI, SAS, BMI]
0.298453	0.416599	1.74801				hs-CRP	CDI 2-SR Depressed mood/somatic symptoms	[Age/sex, SSRI, BMI]
0.309694	0.653698	0.938078				hs-CRP	CDI 2-SR Depressed mood/somatic symptoms	[SSRI, BMI]
0.64204	0.882204	0.290491				hs-CRP	CDI 2-SR Depressed mood/somatic symptoms	[SAS]
0.644993	0.644993	0.844152				hs-CRP	CDI 2-SR Depressed mood/somatic symptoms	[]
0.68972	0.843777	0.390274				hs-CRP	CDI 2-SR Depressed mood/somatic symptoms	[Age/sex, SAS]
0.705041	0.598098	0.978191				hs-CRP	CDI 2-SR Depressed mood/somatic symptoms	[Age/sex]
0.755678	0.661038	1.01003				hs-CRP	CDI 2-SR Depressed mood/somatic symptoms	[Age/sex, SAS, BMI]
0.760022	0.827537	0.481642				hs-CRP	CDI 2-SR Depressed mood/somatic symptoms	[SAS, BMI]
0.762936	0.421743	1.79205				hs-CRP	CDI 2-SR Depressed mood/somatic symptoms	[Age/sex, BMI]
0.876272	0.609841	1.09394				hs-CRP	CDI 2-SR Depressed mood/somatic symptoms	[BMI]
0.0209776	0.106572	2.54008				hs-CRP	CDI 2-SR Negative Self-esteem	[Age/sex, SSRI]
0.039432	0.107706	3.04552				hs-CRP	CDI 2-SR Negative Self-esteem	[Age/sex, SSRI, BMI]
0.0439282	0.115877	2.54246				hs-CRP	CDI 2-SR Negative Self-esteem	[Age/sex]
0.0816737	0.113232	3.08011				hs-CRP	CDI 2-SR Negative Self-esteem	[Age/sex, BMI]
0.136421	0.117519	2.704				hs-CRP	CDI 2-SR Negative Self-esteem	[Age/sex, SSRI, SAS]
0.173002	0.173002	2.29272				hs-CRP	CDI 2-SR Negative Self-esteem	[]
0.176984	0.177601	2.25342				hs-CRP	CDI 2-SR Negative Self-esteem	[SSRI]
0.188715	0.112954	3.18514				hs-CRP	CDI 2-SR Negative Self-esteem	[Age/sex, SSRI, SAS, BMI]
0.244442	0.107821	2.85054				hs-CRP	CDI 2-SR Negative Self-esteem	[Age/sex, SAS]
0.289999	0.151542	2.80241				hs-CRP	CDI 2-SR Negative Self-esteem	[SSRI, BMI]
0.324177	0.109931	3.29735				hs-CRP	CDI 2-SR Negative Self-esteem	[Age/sex, SAS, BMI]
0.328859	0.139994	2.8998				hs-CRP	CDI 2-SR Negative Self-esteem	[BMI]
0.364765	0.149307	2.59184				hs-CRP	CDI 2-SR Negative Self-esteem	[SSRI, SAS]
0.475669	0.131579	2.73963				hs-CRP	CDI 2-SR Negative Self-esteem	[SAS]
0.485933	0.195209	2.62356				hs-CRP	CDI 2-SR Negative Self-esteem	[SSRI, SAS, BMI]
0.610844	0.16726	2.82474				hs-CRP	CDI 2-SR Negative Self-esteem	[SAS, BMI]
0.0387945	0.249558	1.79347				hs-CRP	CDI 2-SR Ineffectiveness	[Age/sex, SSRI]
0.0577756	0.160154	2.62798				hs-CRP	CDI 2-SR Ineffectiveness	[Age/sex, SSRI, BMI]
0.0649957	0.223578	2.01234				hs-CRP	CDI 2-SR Ineffectiveness	[SSRI, SAS]
0.0675286	0.19102	2.14807				hs-CRP	CDI 2-SR Ineffectiveness	[Age/sex, SSRI, SAS]
0.0995297	0.169461	2.62651				hs-CRP	CDI 2-SR Ineffectiveness	[Age/sex, SSRI, SAS, BMI]
0.109845	0.29047	1.9698				hs-CRP	CDI 2-SR Ineffectiveness	[SSRI, SAS, BMI]
0.126627	0.353359	1.50267				hs-CRP	CDI 2-SR Ineffectiveness	[SSRI]
0.205268	0.272463	1.79648				hs-CRP	CDI 2-SR Ineffectiveness	[Age/sex]
0.210714	0.197176	2.22393				hs-CRP	CDI 2-SR Ineffectiveness	[SAS]
0.21969	0.280292	2.04401				hs-CRP	CDI 2-SR Ineffectiveness	[SSRI, BMI]
0.264568	0.174169	2.67164				hs-CRP	CDI 2-SR Ineffectiveness	[Age/sex, BMI]
0.285507	0.178857	2.34102				hs-CRP	CDI 2-SR Ineffectiveness	[Age/sex, SAS]
0.315809	0.244853	2.25844				hs-CRP	CDI 2-SR Ineffectiveness	[SAS, BMI]
0.347902	0.347902	1.55735				hs-CRP	CDI 2-SR Ineffectiveness	[]
0.371267	0.171273	2.77407				hs-CRP	CDI 2-SR Ineffectiveness	[Age/sex, SAS, BMI]
0.525393	0.260396	2.18039				hs-CRP	CDI 2-SR Ineffectiveness	[BMI]
0.0841734	0.0905678	3.18551				hs-CRP	CDI 2-SR Interpersonal Problems	[Age/sex]
0.102578	0.102578	3.12592				hs-CRP	CDI 2-SR Interpersonal Problems	[]
0.123831	0.092033	3.18429				hs-CRP	CDI 2-SR Interpersonal Problems	[Age/sex, SSRI]
0.15531	0.118103	3.53583				hs-CRP	CDI 2-SR Interpersonal Problems	[Age/sex, BMI]
0.191514	0.0711935	4.02852				hs-CRP	CDI 2-SR Interpersonal Problems	[BMI]
0.203855	0.12158	3.51812				hs-CRP	CDI 2-SR Interpersonal Problems	[Age/sex, SSRI, BMI]
0.219973	0.10736	3.1039				hs-CRP	CDI 2-SR Interpersonal Problems	[SSRI]
0.264935	0.101262	3.33852				hs-CRP	CDI 2-SR Interpersonal Problems	[SAS]
0.306144	0.0772302	3.97617				hs-CRP	CDI 2-SR Interpersonal Problems	[SSRI, BMI]
0.310113	0.113168	3.23973				hs-CRP	CDI 2-SR Interpersonal Problems	[Age/sex, SAS]
0.316304	0.113267	3.2433				hs-CRP	CDI 2-SR Interpersonal Problems	[SSRI, SAS]
0.355565	0.124005	3.16208				hs-CRP	CDI 2-SR Interpersonal Problems	[Age/sex, SSRI, SAS]
0.377575	0.121504	3.55168				hs-CRP	CDI 2-SR Interpersonal Problems	[SAS, BMI]
0.416937	0.187117	3.13205				hs-CRP	CDI 2-SR Interpersonal Problems	[Age/sex, SAS, BMI]
0.428875	0.138082	3.42319				hs-CRP	CDI 2-SR Interpersonal Problems	[SSRI, SAS, BMI]
0.461365	0.197864	3.07304				hs-CRP	CDI 2-SR Interpersonal Problems	[Age/sex, SSRI, SAS, BMI]
0.0183303	0.0127791	3.3928				hs-CRP	CDI 2-PV Total score	[BMI]
0.0233493	0.014095	3.3259				hs-CRP	CDI 2-PV Total score	[SSRI, BMI]
0.0567835	0.0209084	3.17947				hs-CRP	CDI 2-PV Total score	[SSRI, SAS, BMI]
0.0832895	0.0173126	3.33305				hs-CRP	CDI 2-PV Total score	[SAS, BMI]
0.0891413	0.0143649	3.49837				hs-CRP	CDI 2-PV Total score	[Age/sex, SSRI, BMI]
0.091149	0.0144453	3.51565				hs-CRP	CDI 2-PV Total score	[Age/sex, BMI]
0.134731	0.0249392	3.26099				hs-CRP	CDI 2-PV Total score	[Age/sex, SSRI, SAS, BMI]
0.156334	0.156334	1.72079				hs-CRP	CDI 2-PV Total score	[]
0.15828	0.160313	1.69184				hs-CRP	CDI 2-PV Total score	[SSRI]
0.186453	0.0242373	3.33002				hs-CRP	CDI 2-PV Total score	[Age/sex, SAS, BMI]
0.245554	0.171428	1.74565				hs-CRP	CDI 2-PV Total score	[SSRI, SAS]
0.382885	0.151003	1.86578				hs-CRP	CDI 2-PV Total score	[SAS]
0.386525	0.194411	1.68481				hs-CRP	CDI 2-PV Total score	[Age/sex, SSRI, SAS]
0.430659	0.174065	1.67623				hs-CRP	CDI 2-PV Total score	[Age/sex, SSRI]
0.490337	0.177266	1.77278				hs-CRP	CDI 2-PV Total score	[Age/sex, SAS]
0.512088	0.176113	1.67745				hs-CRP	CDI 2-PV Total score	[Age/sex]
0.0695481	0.890488	0.0620308	1.064	0.440002	2.57291	hs-CRP	CDI 2-SR_Depressed mood	[SAS, BMI]
0.0748651	0.251165	0.446915	1.56348	0.728759	3.3543	hs-CRP	CDI 2-SR_Depressed mood	[Age/sex]
0.105075	0.207084	0.552361	1.73735	0.736574	4.09787	hs-CRP	CDI 2-SR_Depressed mood	[Age/sex, SAS]
0.107236	0.632588	0.235089	1.26502	0.482546	3.31632	hs-CRP	CDI 2-SR_Depressed mood	[Age/sex, SAS, BMI]
0.107723	0.256968	0.476133	1.60984	0.706736	3.66696	hs-CRP	CDI 2-SR_Depressed mood	[SAS]
0.111573	0.885451	0.0657493	1.06796	0.436589	2.61238	hs-CRP	CDI 2-SR_Depressed mood	[SSRI, SAS, BMI]
0.136696	0.360575	0.395173	1.48464	0.636369	3.46365	hs-CRP	CDI 2-SR_Depressed mood	[Age/sex, BMI]
0.139543	0.253495	0.444277	1.55936	0.727398	3.34289	hs-CRP	CDI 2-SR_Depressed mood	[Age/sex, SSRI]
0.146371	0.202034	0.551928	1.7366	0.743792	4.05459	hs-CRP	CDI 2-SR_Depressed mood	[Age/sex, SSRI, SAS]
0.150769	0.5798	0.270959	1.31122	0.502474	3.42168	hs-CRP	CDI 2-SR_Depressed mood	[Age/sex, SSRI, SAS, BMI]
0.169659	0.255602	0.47503	1.60806	0.708972	3.64734	hs-CRP	CDI 2-SR_Depressed mood	[SSRI, SAS]
0.218961	0.36264	0.389517	1.47627	0.638197	3.41488	hs-CRP	CDI 2-SR_Depressed mood	[Age/sex, SSRI, BMI]
0.34283	0.369717	0.300063	1.34994	0.700768	2.6005	hs-CRP	CDI 2-SR_Depressed mood	[]
0.504925	0.595728	0.194252	1.2144	0.592531	2.48894	hs-CRP	CDI 2-SR_Depressed mood	[BMI]
0.590291	0.363988	0.307171	1.35957	0.700456	2.63891	hs-CRP	CDI 2-SR_Depressed mood	[SSRI]
0.689524	0.598762	0.196598	1.21725	0.585257	2.53172	hs-CRP	CDI 2-SR_Depressed mood	[SSRI, BMI]
0.191328	0.998772	0.000754829	1.00076	0.382727	2.61678	hs-CRP	CDI 2-SR_Irritability	[SAS]
0.206589		-0.0226453	0.977609			hs-CRP	CDI 2-SR_Irritability	[SSRI, SAS]
0.2247		-0.34189	0.710426			hs-CRP	CDI 2-SR_Irritability	[SSRI, SAS, BMI]
0.23667		-0.165793	0.847221			hs-CRP	CDI 2-SR_Irritability	[SAS, BMI]
0.241067		0.18742	1.20613			hs-CRP	CDI 2-SR_Irritability	[Age/sex, SAS]
0.279019		0.171665	1.18728			hs-CRP	CDI 2-SR_Irritability	[Age/sex, SSRI, SAS]
0.314494		0.0709646	1.07354			hs-CRP	CDI 2-SR_Irritability	[Age/sex, SAS, BMI]
0.342294		-0.0466692	0.954403			hs-CRP	CDI 2-SR_Irritability	[Age/sex, SSRI, SAS, BMI]
0.400521	0.537344	0.339121	1.40371	0.477867	4.12335	hs-CRP	CDI 2-SR_Irritability	[Age/sex]
0.465406	0.539228	0.342199	1.40804	0.472283	4.19786	hs-CRP	CDI 2-SR_Irritability	[Age/sex, SSRI]
0.504271	0.735293	0.197757	1.21867	0.387258	3.83504	hs-CRP	CDI 2-SR_Irritability	[Age/sex, BMI]
0.507534	0.657064	0.22181	1.24833	0.468886	3.32349	hs-CRP	CDI 2-SR_Irritability	[SSRI]
0.544386	0.933694	-0.0464626	0.9546	0.319494	2.85221	hs-CRP	CDI 2-SR_Irritability	[SSRI, BMI]
0.560485	0.793553	0.162018	1.17588	0.34945	3.95679	hs-CRP	CDI 2-SR_Irritability	[Age/sex, SSRI, BMI]
0.603575	0.972787	0.0175226	1.01768	0.371867	2.78504	hs-CRP	CDI 2-SR_Irritability	[BMI]
0.662811	0.677334	0.200258	1.22172	0.475678	3.13783	hs-CRP	CDI 2-SR_Irritability	[]
0.0238	0.105448	1.80564	6.08389	0.683673	54.1395	hs-CRP	CDI 2-SR Anhedonia	[Age/sex]
0.0372663	0.100643	1.82612	6.20977	0.701903	54.9383	hs-CRP	CDI 2-SR Anhedonia	[Age/sex, SSRI]
0.0453515	0.155024	1.64076	5.15908	0.537562	49.5127	hs-CRP	CDI 2-SR Anhedonia	[Age/sex, BMI]
0.050925	0.317774	1.41528	4.11763	0.256334	66.1437	hs-CRP	CDI 2-SR Anhedonia	[Age/sex, SAS, BMI]
0.0545717	0.387083	1.15688	3.18001	0.231149	43.7485	hs-CRP	CDI 2-SR Anhedonia	[SAS, BMI]
0.0552201	0.132033	2.14415	8.53476	0.524096	138.986	hs-CRP	CDI 2-SR Anhedonia	[Age/sex, SAS]
0.0568289	0.178052	1.70976	5.52766	0.459115	66.552	hs-CRP	CDI 2-SR Anhedonia	[SAS]
0.0675404	0.157261	1.68516	5.39334	0.521996	55.7248	hs-CRP	CDI 2-SR Anhedonia	[Age/sex, SSRI, BMI]
0.069628	0.41873	1.09629	2.99303	0.209944	42.6696	hs-CRP	CDI 2-SR Anhedonia	[SSRI, SAS, BMI]
0.0718215	0.341813	1.38024	3.97585	0.23094	68.4478	hs-CRP	CDI 2-SR Anhedonia	[Age/sex, SSRI, SAS, BMI]
0.0724771	0.16683	1.76143	5.82073	0.479118	70.7153	hs-CRP	CDI 2-SR Anhedonia	[SSRI, SAS]
0.0751593	0.127628	2.16469	8.7119	0.537882	141.104	hs-CRP	CDI 2-SR Anhedonia	[Age/sex, SSRI, SAS]
0.0818335	0.190831	1.0906	2.97607	0.580742	15.2512	hs-CRP	CDI 2-SR Anhedonia	[]
0.0949218	0.167969	1.1862	3.2746	0.606511	17.6798	hs-CRP	CDI 2-SR Anhedonia	[SSRI]
0.142037	0.286974	0.921486	2.51302	0.460838	13.7039	hs-CRP	CDI 2-SR Anhedonia	[BMI]
0.160786	0.297205	0.948948	2.58299	0.433777	15.3808	hs-CRP	CDI 2-SR Anhedonia	[SSRI, BMI]
0.0246823	0.378435	0.302024	1.35259	0.690697	2.64879	hs-CRP	CDI 2-SR_Hypophagia	[BMI]
0.0507389	0.225372	0.441513	1.55506	0.76166	3.17492	hs-CRP	CDI 2-SR_Hypophagia	[Age/sex, BMI]
0.051363	0.359694	0.314333	1.36935	0.698875	2.68304	hs-CRP	CDI 2-SR_Hypophagia	[SSRI, BMI]
0.0715932	0.193498	0.481187	1.61799	0.783399	3.34172	hs-CRP	CDI 2-SR_Hypophagia	[Age/sex, SSRI, BMI]
0.267901	0.427868	0.278683	1.32139	0.663492	2.63164	hs-CRP	CDI 2-SR_Hypophagia	[SAS, BMI]
0.284429	0.264502	0.423536	1.52735	0.725845	3.21392	hs-CRP	CDI 2-SR_Hypophagia	[Age/sex, SAS, BMI]
0.313852	0.229182	0.465483	1.59278	0.74585	3.40143	hs-CRP	CDI 2-SR_Hypophagia	[Age/sex, SSRI, SAS, BMI]
0.332994	0.416885	0.285977	1.33106	0.667351	2.65486	hs-CRP	CDI 2-SR_Hypophagia	[SSRI, SAS, BMI]
0.702758	0.703119	-0.0976818	0.906937	0.548793	1.49881	hs-CRP	CDI 2-SR_Hypophagia	[]
0.764205	0.693341	-0.101731	0.903273	0.544778	1.49768	hs-CRP	CDI 2-SR_Hypophagia	[SSRI]
0.949387	0.715822	-0.0944203	0.9099	0.547298	1.51274	hs-CRP	CDI 2-SR_Hypophagia	[Age/sex, SSRI]
0.958258	0.815474	-0.0639209	0.938079	0.548394	1.60467	hs-CRP	CDI 2-SR_Hypophagia	[SAS]
0.959506	0.786567	-0.0748087	0.927921	0.539935	1.59471	hs-CRP	CDI 2-SR_Hypophagia	[SSRI, SAS]
0.970091	0.718171	-0.0928589	0.911322	0.550379	1.50897	hs-CRP	CDI 2-SR_Hypophagia	[Age/sex]
0.98183	0.826017	-0.0609303	0.940889	0.546503	1.61988	hs-CRP	CDI 2-SR_Hypophagia	[Age/sex, SAS]
0.982514	0.802541	-0.0701031	0.932298	0.538176	1.61505	hs-CRP	CDI 2-SR_Hypophagia	[Age/sex, SSRI, SAS]
0.0322854	0.446506	-0.273157	0.760974	0.376649	1.53745	hs-CRP	CDI 2-SR_Hyperphagia	[SSRI, BMI]
0.0487553	0.238494	-0.468039	0.626229	0.287577	1.36368	hs-CRP	CDI 2-SR_Hyperphagia	[SSRI, SAS, BMI]
0.0575154	0.537681	-0.199889	0.818822	0.433635	1.54616	hs-CRP	CDI 2-SR_Hyperphagia	[BMI]
0.108535	0.302089	-0.437597	0.645586	0.281195	1.48218	hs-CRP	CDI 2-SR_Hyperphagia	[Age/sex, SSRI, SAS, BMI]
0.109337	0.542659	-0.227539	0.796491	0.382863	1.65699	hs-CRP	CDI 2-SR_Hyperphagia	[Age/sex, SSRI, BMI]
0.133319	0.367784	-0.316021	0.729044	0.366503	1.45021	hs-CRP	CDI 2-SR_Hyperphagia	[SAS, BMI]
0.216954	0.598557	-0.177795	0.837114	0.431845	1.62271	hs-CRP	CDI 2-SR_Hyperphagia	[Age/sex, BMI]
0.26072	0.418062	-0.303305	0.738374	0.354373	1.53848	hs-CRP	CDI 2-SR_Hyperphagia	[Age/sex, SAS, BMI]
0.304677	0.848511	-0.0576633	0.943968	0.5224	1.70573	hs-CRP	CDI 2-SR_Hyperphagia	[SSRI, SAS]
0.32682	0.626298	0.128714	1.13737	0.677488	1.90941	hs-CRP	CDI 2-SR_Hyperphagia	[SSRI]
0.350305	0.936621	-0.0253817	0.974938	0.521527	1.82254	hs-CRP	CDI 2-SR_Hyperphagia	[Age/sex, SSRI, SAS]
0.454027	0.580852	0.152148	1.16433	0.678454	1.99817	hs-CRP	CDI 2-SR_Hyperphagia	[Age/sex, SSRI]
0.505202	0.945224	-0.0194644	0.980724	0.56286	1.70881	hs-CRP	CDI 2-SR_Hyperphagia	[SAS]
0.593725	0.972889	0.00995609	1.01001	0.5688	1.79344	hs-CRP	CDI 2-SR_Hyperphagia	[Age/sex, SAS]
0.616453	0.61788	0.128473	1.13709	0.686406	1.88369	hs-CRP	CDI 2-SR_Hyperphagia	[]
0.72857	0.582949	0.145272	1.15635	0.688472	1.94221	hs-CRP	CDI 2-SR_Hyperphagia	[Age/sex]
0.0552918	0.822652	0.0911914	1.09548	0.493498	2.43177	hs-CRP	CDI 2-SR Insomnia	[Age/sex, SAS, BMI]
0.0657811	0.652135	0.193135	1.21305	0.523839	2.80904	hs-CRP	CDI 2-SR Insomnia	[Age/sex, SSRI, SAS, BMI]
0.104834	0.98817	0.00478978	1.0048	0.533467	1.89257	hs-CRP	CDI 2-SR Insomnia	[Age/sex, BMI]
0.110889	0.241365	-0.381381	0.682918	0.360811	1.29258	hs-CRP	CDI 2-SR Insomnia	[Age/sex, SAS]
0.142243	0.392517	-0.239796	0.786788	0.454092	1.36324	hs-CRP	CDI 2-SR Insomnia	[Age/sex]
0.156519	0.251713	-0.380251	0.68369	0.35684	1.30992	hs-CRP	CDI 2-SR Insomnia	[Age/sex, SSRI, SAS]
0.168424	0.99314	0.00277962	1.00278	0.532132	1.88971	hs-CRP	CDI 2-SR Insomnia	[Age/sex, SSRI, BMI]
0.174425	0.251428	-0.34328	0.709439	0.394583	1.27553	hs-CRP	CDI 2-SR Insomnia	[SAS]
0.188379	0.684422	-0.144334	0.865599	0.431557	1.73618	hs-CRP	CDI 2-SR Insomnia	[SAS, BMI]
0.232423	0.397315	-0.239581	0.786958	0.451876	1.37051	hs-CRP	CDI 2-SR Insomnia	[Age/sex, SSRI]
0.254973	0.257491	-0.340301	0.711556	0.394819	1.28239	hs-CRP	CDI 2-SR Insomnia	[SSRI, SAS]
0.257562	0.722202	-0.1273	0.880469	0.43644	1.77625	hs-CRP	CDI 2-SR Insomnia	[SSRI, SAS, BMI]
0.353805	0.354311	-0.242113	0.784967	0.470281	1.31022	hs-CRP	CDI 2-SR Insomnia	[]
0.594181	0.556901	-0.177707	0.837188	0.462732	1.51466	hs-CRP	CDI 2-SR Insomnia	[BMI]
0.64072	0.352922	-0.242961	0.784302	0.469735	1.30952	hs-CRP	CDI 2-SR Insomnia	[SSRI]
0.785211	0.552392	-0.179632	0.835578	0.462011	1.5112	hs-CRP	CDI 2-SR Insomnia	[SSRI, BMI]
0.347326	0.458703	0.229485	1.25795	0.685558	2.30826	hs-CRP	CDI 2-SR_Hypersomnia	[BMI]
0.357058	0.422871	0.259143	1.29582	0.687566	2.44216	hs-CRP	CDI 2-SR_Hypersomnia	[SSRI, BMI]
0.549016	0.322194	0.33948	1.40422	0.71703	2.74999	hs-CRP	CDI 2-SR_Hypersomnia	[Age/sex, SSRI, BMI]
0.58067	0.969721	0.0100357	1.01009	0.601602	1.69593	hs-CRP	CDI 2-SR_Hypersomnia	[SSRI]
0.595972	0.373698	0.287738	1.33341	0.707351	2.51357	hs-CRP	CDI 2-SR_Hypersomnia	[Age/sex, BMI]
0.605739	0.266169	0.393088	1.48155	0.740969	2.96232	hs-CRP	CDI 2-SR_Hypersomnia	[SSRI, SAS, BMI]
0.616241	0.311398	0.341537	1.40711	0.726341	2.72593	hs-CRP	CDI 2-SR_Hypersomnia	[SAS, BMI]
0.68615	0.167661	0.530533	1.69984	0.800038	3.61164	hs-CRP	CDI 2-SR_Hypersomnia	[Age/sex, SSRI, SAS, BMI]
0.75209	0.237944	0.423968	1.52801	0.755668	3.08974	hs-CRP	CDI 2-SR_Hypersomnia	[Age/sex, SAS, BMI]
0.828796	0.706629	0.108854	1.115	0.63256	1.96538	hs-CRP	CDI 2-SR_Hypersomnia	[SSRI, SAS]
0.832349	0.706835	0.106603	1.11249	0.638316	1.93891	hs-CRP	CDI 2-SR_Hypersomnia	[SAS]
0.885181	0.973601	0.00880384	1.00884	0.598928	1.69931	hs-CRP	CDI 2-SR_Hypersomnia	[Age/sex, SSRI]
0.94084	0.692408	0.115192	1.12209	0.634112	1.98558	hs-CRP	CDI 2-SR_Hypersomnia	[Age/sex, SSRI, SAS]
0.95181	0.703203	0.108584	1.1147	0.637628	1.94871	hs-CRP	CDI 2-SR_Hypersomnia	[Age/sex, SAS]
0.955476	0.955468	0.0144904	1.0146	0.610121	1.68721	hs-CRP	CDI 2-SR_Hypersomnia	[]
0.988526	0.968237	0.0103899	1.01044	0.605919	1.68504	hs-CRP	CDI 2-SR_Hypersomnia	[Age/sex]
0.673359	0.738147	0.11653	1.12359	0.56742	2.22491	hs-CRP	CDI 2-SR Tiredness	[BMI]
0.698564	0.595432	0.190378	1.20971	0.599087	2.4427	hs-CRP	CDI 2-SR Tiredness	[Age/sex, SSRI, BMI]
0.698577	0.554042	0.219651	1.24564	0.601752	2.57851	hs-CRP	CDI 2-SR Tiredness	[Age/sex, BMI]
0.751352	0.777683	0.0962126	1.10099	0.564575	2.14708	hs-CRP	CDI 2-SR Tiredness	[SSRI, BMI]
0.776482	0.873211	-0.0455436	0.955478	0.546126	1.67166	hs-CRP	CDI 2-SR Tiredness	[SSRI]
0.78718	0.936856	-0.0232037	0.977063	0.550315	1.73474	hs-CRP	CDI 2-SR Tiredness	[Age/sex, SSRI]
0.8168	0.980837	-0.00755804	0.99247	0.535647	1.83889	hs-CRP	CDI 2-SR Tiredness	[SAS]
0.83976	0.933548	-0.0260568	0.97428	0.528057	1.79757	hs-CRP	CDI 2-SR Tiredness	[SSRI, SAS]
0.84112	0.942001	-0.0212718	0.978953	0.55194	1.73633	hs-CRP	CDI 2-SR Tiredness	[Age/sex]
0.876039	0.860616	0.0622527	1.06423	0.531198	2.13214	hs-CRP	CDI 2-SR Tiredness	[SAS, BMI]
0.882549	0.711883	0.13424	1.14367	0.560935	2.33177	hs-CRP	CDI 2-SR Tiredness	[Age/sex, SSRI, SAS, BMI]
0.884141	0.65446	0.16615	1.18075	0.570391	2.44424	hs-CRP	CDI 2-SR Tiredness	[Age/sex, SAS, BMI]
0.884233	0.88377	-0.0417431	0.959116	0.548052	1.6785	hs-CRP	CDI 2-SR Tiredness	[]
0.886607	0.983651	-0.00650727	0.993514	0.53318	1.85129	hs-CRP	CDI 2-SR Tiredness	[Age/sex, SSRI, SAS]
0.893538	0.925004	0.0328791	1.03343	0.521157	2.04923	hs-CRP	CDI 2-SR Tiredness	[SSRI, SAS, BMI]
0.893678	0.970611	0.0117652	1.01183	0.541104	1.89208	hs-CRP	CDI 2-SR Tiredness	[Age/sex, SAS]
0.00674995	0.0390514	2.18966	8.93216	1.11629	71.4719	hs-CRP	CDI 2-SR_Self-hatred	[Age/sex, SAS]
0.00928992	0.026481	2.33781	10.3585	1.31388	81.6659	hs-CRP	CDI 2-SR_Self-hatred	[Age/sex, SSRI, SAS]
0.0109659	0.0714524	1.26644	3.54821	0.895328	14.0616	hs-CRP	CDI 2-SR_Self-hatred	[Age/sex]
0.011306	0.0352294	1.69659	5.45529	1.1246	26.4629	hs-CRP	CDI 2-SR_Self-hatred	[Age/sex, BMI]
0.0123761	0.0428022	2.20182	9.04148	1.07399	76.1163	hs-CRP	CDI 2-SR_Self-hatred	[Age/sex, SAS, BMI]
0.0158672	0.0281785	2.39484	10.9665	1.29205	93.0791	hs-CRP	CDI 2-SR_Self-hatred	[Age/sex, SSRI, SAS, BMI]
0.0193762	0.0362953	1.7084	5.52014	1.11522	27.3237	hs-CRP	CDI 2-SR_Self-hatred	[SAS]
0.0224518	0.0418535	1.79978	6.04829	1.06859	34.2337	hs-CRP	CDI 2-SR_Self-hatred	[Age/sex, SSRI, BMI]
0.0227155	0.0220846	1.90284	6.70491	1.31451	34.1997	hs-CRP	CDI 2-SR_Self-hatred	[SSRI, SAS]
0.0243426	0.0742418	1.25577	3.51054	0.884267	13.9368	hs-CRP	CDI 2-SR_Self-hatred	[Age/sex, SSRI]
0.0341319	0.0500822	1.64192	5.16505	0.999412	26.6935	hs-CRP	CDI 2-SR_Self-hatred	[SAS, BMI]
0.0396954	0.02802	1.8761	6.52801	1.22436	34.8058	hs-CRP	CDI 2-SR_Self-hatred	[SSRI, SAS, BMI]
0.0465301	0.107891	0.842033	2.32108	0.831545	6.47881	hs-CRP	CDI 2-SR_Self-hatred	[]
0.100869	0.0780358	1.02508	2.78732	0.891329	8.71634	hs-CRP	CDI 2-SR_Self-hatred	[BMI]
0.13292	0.106848	0.856761	2.35552	0.831436	6.67336	hs-CRP	CDI 2-SR_Self-hatred	[SSRI]
0.177881	0.0782659	1.14725	3.14953	0.878325	11.2937	hs-CRP	CDI 2-SR_Self-hatred	[SSRI, BMI]
0.134581	0.882462	-0.04558	0.955443	0.522144	1.74831	hs-CRP	CDI 2-SR Guilty	[SAS]
0.180168	0.998196	-0.000724193	0.999276	0.53342	1.87198	hs-CRP	CDI 2-SR Guilty	[Age/sex, SAS]
0.184557	0.629657	0.178719	1.19568	0.578283	2.47225	hs-CRP	CDI 2-SR Guilty	[Age/sex, SAS, BMI]
0.187482	0.92086	0.0338309	1.03441	0.530691	2.01625	hs-CRP	CDI 2-SR Guilty	[SAS, BMI]
0.189793	0.924661	-0.0298436	0.970597	0.522887	1.80165	hs-CRP	CDI 2-SR Guilty	[SSRI, SAS]
0.241551	0.579453	0.215921	1.241	0.578267	2.66329	hs-CRP	CDI 2-SR Guilty	[Age/sex, SSRI, SAS, BMI]
0.242311	0.842233	0.0716115	1.07424	0.5307	2.17446	hs-CRP	CDI 2-SR Guilty	[SSRI, SAS, BMI]
0.247194	0.977079	0.00933465	1.00938	0.533954	1.90811	hs-CRP	CDI 2-SR Guilty	[Age/sex, SSRI, SAS]
0.264417	0.429774	0.293338	1.3409	0.647386	2.77733	hs-CRP	CDI 2-SR Guilty	[Age/sex, BMI]
0.321986	0.969944	0.0107335	1.01079	0.57834	1.76661	hs-CRP	CDI 2-SR Guilty	[Age/sex]
0.367578	0.403674	0.325246	1.38437	0.645248	2.97015	hs-CRP	CDI 2-SR Guilty	[Age/sex, SSRI, BMI]
0.467121	0.961368	0.0138779	1.01397	0.578292	1.7779	hs-CRP	CDI 2-SR Guilty	[Age/sex, SSRI]
0.550475	0.633412	0.158356	1.17158	0.611148	2.24595	hs-CRP	CDI 2-SR Guilty	[BMI]
0.619715	0.578445	0.19616	1.21672	0.609111	2.43045	hs-CRP	CDI 2-SR Guilty	[SSRI, BMI]
0.800395	0.931809	-0.0234294	0.976843	0.571161	1.67067	hs-CRP	CDI 2-SR Guilty	[SSRI]
0.923296	0.923148	-0.0261202	0.974218	0.573038	1.65626	hs-CRP	CDI 2-SR Guilty	[]
0.0460821	0.105813	0.855271	2.35201	0.834261	6.63097	hs-CRP	CDI 2-SR Difficulties in concentration	[Age/sex, SSRI]
0.0693847	0.115368	0.839086	2.31425	0.814313	6.57702	hs-CRP	CDI 2-SR Difficulties in concentration	[Age/sex, SSRI, BMI]
0.0865369	0.147255	0.771672	2.16338	0.761928	6.1426	hs-CRP	CDI 2-SR Difficulties in concentration	[Age/sex]
0.150619	0.104176	0.912888	2.49151	0.828435	7.49318	hs-CRP	CDI 2-SR Difficulties in concentration	[Age/sex, SSRI, SAS]
0.154202	0.185337	0.726921	2.0687	0.705562	6.06541	hs-CRP	CDI 2-SR Difficulties in concentration	[Age/sex, BMI]
0.191397	0.252125	0.53082	1.70033	0.685467	4.21772	hs-CRP	CDI 2-SR Difficulties in concentration	[]
0.206966	0.102461	0.963973	2.62209	0.824495	8.33888	hs-CRP	CDI 2-SR Difficulties in concentration	[Age/sex, SSRI, SAS, BMI]
0.21636	0.260519	0.504787	1.65663	0.68762	3.9912	hs-CRP	CDI 2-SR Difficulties in concentration	[SSRI]
0.267632	0.366124	0.417636	1.51837	0.6138	3.75601	hs-CRP	CDI 2-SR Difficulties in concentration	[SSRI, BMI]
0.326991	0.172816	0.777141	2.17524	0.71163	6.64907	hs-CRP	CDI 2-SR Difficulties in concentration	[Age/sex, SAS]
0.332971	0.402337	0.411235	1.50868	0.576251	3.94987	hs-CRP	CDI 2-SR Difficulties in concentration	[BMI]
0.422737	0.185514	0.831634	2.29707	0.670659	7.86768	hs-CRP	CDI 2-SR Difficulties in concentration	[Age/sex, SAS, BMI]
0.468234	0.2797	0.509222	1.664	0.660965	4.18915	hs-CRP	CDI 2-SR Difficulties in concentration	[SSRI, SAS]
0.582309	0.33576	0.480191	1.61638	0.608014	4.29709	hs-CRP	CDI 2-SR Difficulties in concentration	[SSRI, SAS, BMI]
0.605516	0.318806	0.480312	1.61658	0.628766	4.15628	hs-CRP	CDI 2-SR Difficulties in concentration	[SAS]
0.717716	0.422233	0.420147	1.52219	0.545572	4.247	hs-CRP	CDI 2-SR Difficulties in concentration	[SAS, BMI]
0.161241	0.336008	-0.354171	0.701755	0.341061	1.4439	hs-CRP	CDI 2-SR Indeciseveness	[Age/sex, SAS]
0.161326	0.496092	-0.235324	0.790315	0.40134	1.55628	hs-CRP	CDI 2-SR Indeciseveness	[SSRI, SAS]
0.169345	0.405002	-0.326473	0.721464	0.334577	1.55573	hs-CRP	CDI 2-SR Indeciseveness	[Age/sex, SSRI, SAS]
0.175825	0.455483	-0.251854	0.777358	0.401206	1.50617	hs-CRP	CDI 2-SR Indeciseveness	[SAS]
0.17589	0.940554	-0.0302667	0.970187	0.437911	2.14944	hs-CRP	CDI 2-SR Indeciseveness	[SSRI, SAS, BMI]
0.182667	0.905627	-0.0550865	0.946403	0.380687	2.3528	hs-CRP	CDI 2-SR Indeciseveness	[Age/sex, SSRI, SAS, BMI]
0.201625	0.667008	-0.186512	0.829849	0.354824	1.94082	hs-CRP	CDI 2-SR Indeciseveness	[Age/sex, SAS, BMI]
0.217468	0.830686	-0.0868497	0.916815	0.413563	2.03246	hs-CRP	CDI 2-SR Indeciseveness	[SAS, BMI]
0.623993	0.790379	-0.0793445	0.923722	0.514594	1.65812	hs-CRP	CDI 2-SR Indeciseveness	[SSRI]
0.799385	0.910708	-0.0382117	0.962509	0.493598	1.87688	hs-CRP	CDI 2-SR Indeciseveness	[SSRI, BMI]
0.806364	0.804749	-0.0736839	0.928965	0.517946	1.66615	hs-CRP	CDI 2-SR Indeciseveness	[]
0.854257	0.817239	-0.0704372	0.931986	0.512823	1.69376	hs-CRP	CDI 2-SR Indeciseveness	[Age/sex, SSRI]
0.897772	0.949678	0.0221022	1.02235	0.514638	2.03093	hs-CRP	CDI 2-SR Indeciseveness	[Age/sex, SSRI, BMI]
0.915665	0.802348	-0.0753986	0.927374	0.513871	1.67362	hs-CRP	CDI 2-SR Indeciseveness	[Age/sex]
0.930015	0.953023	-0.0207177	0.979495	0.49165	1.95141	hs-CRP	CDI 2-SR Indeciseveness	[BMI]
0.937241	0.93829	0.0277684	1.02816	0.50904	2.07667	hs-CRP	CDI 2-SR Indeciseveness	[Age/sex, BMI]
0.219488	0.399976	0.309473	1.36271	0.662862	2.80144	hs-CRP	CDI 2-SR_Suicidal ideation	[Age/sex]
0.348236	0.398461	0.309766	1.36311	0.664139	2.79769	hs-CRP	CDI 2-SR_Suicidal ideation	[Age/sex, SSRI]
0.352056	0.444323	0.311549	1.36554	0.614625	3.03387	hs-CRP	CDI 2-SR_Suicidal ideation	[Age/sex, BMI]
0.486275	0.443951	0.308311	1.36112	0.61814	2.99715	hs-CRP	CDI 2-SR_Suicidal ideation	[Age/sex, SSRI, BMI]
0.518368	0.293819	0.409043	1.50538	0.70142	3.23081	hs-CRP	CDI 2-SR_Suicidal ideation	[Age/sex, SAS]
0.525083	0.539352	0.200323	1.2218	0.644457	2.31635	hs-CRP	CDI 2-SR_Suicidal ideation	[]
0.594846	0.424124	0.334977	1.39791	0.614815	3.17843	hs-CRP	CDI 2-SR_Suicidal ideation	[Age/sex, SAS, BMI]
0.625909	0.299216	0.405689	1.50034	0.6975	3.22725	hs-CRP	CDI 2-SR_Suicidal ideation	[Age/sex, SSRI, SAS]
0.689932	0.427528	0.329845	1.39075	0.615726	3.14132	hs-CRP	CDI 2-SR_Suicidal ideation	[Age/sex, SSRI, SAS, BMI]
0.694201	0.711085	0.145485	1.1566	0.53561	2.49757	hs-CRP	CDI 2-SR_Suicidal ideation	[SAS, BMI]
0.715982	0.748825	0.116115	1.12312	0.551754	2.28618	hs-CRP	CDI 2-SR_Suicidal ideation	[BMI]
0.748214	0.388962	0.312256	1.3665	0.671565	2.78057	hs-CRP	CDI 2-SR_Suicidal ideation	[SAS]
0.787786	0.534866	0.203981	1.22627	0.643887	2.33543	hs-CRP	CDI 2-SR_Suicidal ideation	[SSRI]
0.793196	0.708326	0.148737	1.16037	0.532322	2.5294	hs-CRP	CDI 2-SR_Suicidal ideation	[SSRI, SAS, BMI]
0.840953	0.381539	0.324385	1.38318	0.668866	2.86034	hs-CRP	CDI 2-SR_Suicidal ideation	[SSRI, SAS]
0.868642	0.749218	0.117656	1.12486	0.546777	2.31411	hs-CRP	CDI 2-SR_Suicidal ideation	[SSRI, BMI]
0.16322	0.463433	-1.64156				IL-6	CDI 2-SR Total score	[Age/sex, SSRI]
0.186608	0.616858	-1.09836				IL-6	CDI 2-SR Total score	[SSRI, SAS]
0.230336	0.839405	-0.440616				IL-6	CDI 2-SR Total score	[SSRI]
0.257685	0.407739	-1.94227				IL-6	CDI 2-SR Total score	[Age/sex, SSRI, SAS]
0.260094	0.447694	-1.77722				IL-6	CDI 2-SR Total score	[Age/sex, SSRI, BMI]
0.26247	0.578191	-1.24902				IL-6	CDI 2-SR Total score	[SSRI, SAS, BMI]
0.34822	0.402178	-2.00827				IL-6	CDI 2-SR Total score	[Age/sex, SSRI, SAS, BMI]
0.405701	0.832263	-0.475497				IL-6	CDI 2-SR Total score	[SSRI, BMI]
0.524014	0.731117	-0.783581				IL-6	CDI 2-SR Total score	[SAS]
0.556809	0.584795	-1.26539				IL-6	CDI 2-SR Total score	[Age/sex]
0.640543	0.694934	-0.915012				IL-6	CDI 2-SR Total score	[SAS, BMI]
0.701595	0.589181	-1.3221				IL-6	CDI 2-SR Total score	[Age/sex, SAS]
0.721806	0.575113	-1.35638				IL-6	CDI 2-SR Total score	[Age/sex, BMI]
0.792031	0.573236	-1.40905				IL-6	CDI 2-SR Total score	[Age/sex, SAS, BMI]
0.874111	0.874111	-0.351582				IL-6	CDI 2-SR Total score	[]
0.987601	0.876257	-0.356649				IL-6	CDI 2-SR Total score	[BMI]
0.166315	0.512224	-1.4856				IL-6	CDI 2-SR Depressed mood/somatic symptoms	[SSRI, SAS]
0.179483	0.874261	-0.354363				IL-6	CDI 2-SR Depressed mood/somatic symptoms	[SSRI]
0.212131	0.563683	-1.38808				IL-6	CDI 2-SR Depressed mood/somatic symptoms	[Age/sex, SSRI, SAS]
0.240185	0.741403	-0.772047				IL-6	CDI 2-SR Depressed mood/somatic symptoms	[Age/sex, SSRI]
0.250981	0.521021	-1.4912				IL-6	CDI 2-SR Depressed mood/somatic symptoms	[SSRI, SAS, BMI]
0.283922	0.610158	-1.24947				IL-6	CDI 2-SR Depressed mood/somatic symptoms	[Age/sex, SSRI, SAS, BMI]
0.332141	0.858121	-0.413303				IL-6	CDI 2-SR Depressed mood/somatic symptoms	[SSRI, BMI]
0.361621	0.787395	-0.659488				IL-6	CDI 2-SR Depressed mood/somatic symptoms	[Age/sex, SSRI, BMI]
0.609907	0.635427	-1.12771				IL-6	CDI 2-SR Depressed mood/somatic symptoms	[SAS]
0.684307	0.77686	-0.716457				IL-6	CDI 2-SR Depressed mood/somatic symptoms	[Age/sex, SAS]
0.73738	0.647821	-1.11317				IL-6	CDI 2-SR Depressed mood/somatic symptoms	[SAS, BMI]
0.766542	0.874198	-0.383052				IL-6	CDI 2-SR Depressed mood/somatic symptoms	[Age/sex]
0.771697	0.817309	-0.596078				IL-6	CDI 2-SR Depressed mood/somatic symptoms	[Age/sex, SAS, BMI]
0.879238	0.928313	-0.227278				IL-6	CDI 2-SR Depressed mood/somatic symptoms	[Age/sex, BMI]
0.911774	0.911774	-0.254645				IL-6	CDI 2-SR Depressed mood/somatic symptoms	[]
0.992528	0.90601	-0.280078				IL-6	CDI 2-SR Depressed mood/somatic symptoms	[BMI]
0.0591631	0.649384	-0.947436				IL-6	CDI 2-SR Negative Self-esteem	[Age/sex, SSRI]
0.0964604	0.558734	-1.2703				IL-6	CDI 2-SR Negative Self-esteem	[Age/sex, SSRI, BMI]
0.128897	0.764214	-0.639944				IL-6	CDI 2-SR Negative Self-esteem	[Age/sex]
0.208997	0.677861	-0.923807				IL-6	CDI 2-SR Negative Self-esteem	[Age/sex, BMI]
0.262135	0.56959	-1.27807				IL-6	CDI 2-SR Negative Self-esteem	[Age/sex, SSRI, SAS]
0.34136	0.539209	-1.40788				IL-6	CDI 2-SR Negative Self-esteem	[Age/sex, SSRI, SAS, BMI]
0.416664	0.725167	0.743239				IL-6	CDI 2-SR Negative Self-esteem	[SSRI]
0.485412	0.728118	-0.798819				IL-6	CDI 2-SR Negative Self-esteem	[Age/sex, SAS]
0.577667	0.686334	-0.946489				IL-6	CDI 2-SR Negative Self-esteem	[Age/sex, SAS, BMI]
0.62344	0.831055	0.471792				IL-6	CDI 2-SR Negative Self-esteem	[SSRI, SAS]
0.626441	0.752449	0.688355				IL-6	CDI 2-SR Negative Self-esteem	[SSRI, BMI]
0.69792	0.905055	0.269263				IL-6	CDI 2-SR Negative Self-esteem	[SSRI, SAS, BMI]
0.704448	0.704448	0.807101				IL-6	CDI 2-SR Negative Self-esteem	[]
0.813354	0.759079	0.685584				IL-6	CDI 2-SR Negative Self-esteem	[SAS]
0.866268	0.827547	0.497165				IL-6	CDI 2-SR Negative Self-esteem	[SAS, BMI]
0.928645	0.724548	0.773778				IL-6	CDI 2-SR Negative Self-esteem	[BMI]
0.0613102	0.614155	-1.03189				IL-6	CDI 2-SR Ineffectiveness	[Age/sex, SSRI]
0.112419	0.957652	0.107659				IL-6	CDI 2-SR Ineffectiveness	[SSRI, SAS]
0.11343	0.618311	-1.06646				IL-6	CDI 2-SR Ineffectiveness	[Age/sex, SSRI, BMI]
0.113525	0.660634	-0.934788				IL-6	CDI 2-SR Ineffectiveness	[Age/sex, SSRI, SAS]
0.160266	0.969127	-0.0801117				IL-6	CDI 2-SR Ineffectiveness	[SSRI, SAS, BMI]
0.168774	0.64213	-1.0107				IL-6	CDI 2-SR Ineffectiveness	[Age/sex, SSRI, SAS, BMI]
0.193008	0.868356	0.337836				IL-6	CDI 2-SR Ineffectiveness	[SSRI]
0.328457	0.763834	-0.644353				IL-6	CDI 2-SR Ineffectiveness	[Age/sex]
0.35363	0.863068	0.362993				IL-6	CDI 2-SR Ineffectiveness	[SSRI, BMI]
0.36502	0.846967	0.408155				IL-6	CDI 2-SR Ineffectiveness	[SAS]
0.465105	0.911825	0.239205				IL-6	CDI 2-SR Ineffectiveness	[SAS, BMI]
0.46616	0.885606	-0.323427				IL-6	CDI 2-SR Ineffectiveness	[Age/sex, SAS]
0.492769	0.777195	-0.634154				IL-6	CDI 2-SR Ineffectiveness	[Age/sex, BMI]
0.572422	0.854773	-0.420213				IL-6	CDI 2-SR Ineffectiveness	[Age/sex, SAS, BMI]
0.83829	0.83829	0.426174				IL-6	CDI 2-SR Ineffectiveness	[]
0.971892	0.823548	0.480561				IL-6	CDI 2-SR Ineffectiveness	[BMI]
0.285791	0.797095	-0.639991				IL-6	CDI 2-SR Interpersonal Problems	[Age/sex]
0.353427	0.749748	-0.799781				IL-6	CDI 2-SR Interpersonal Problems	[Age/sex, SSRI]
0.363468	0.661931	-1.1308				IL-6	CDI 2-SR Interpersonal Problems	[Age/sex, BMI]
0.416694	0.613849	-1.31494				IL-6	CDI 2-SR Interpersonal Problems	[Age/sex, SSRI, BMI]
0.578874	0.764847	-0.792788				IL-6	CDI 2-SR Interpersonal Problems	[Age/sex, SAS]
0.59425	0.67472	-1.12629				IL-6	CDI 2-SR Interpersonal Problems	[Age/sex, SAS, BMI]
0.596989	0.690948	-1.06388				IL-6	CDI 2-SR Interpersonal Problems	[Age/sex, SSRI, SAS]
0.602054	0.9734	-0.0838278				IL-6	CDI 2-SR Interpersonal Problems	[SAS]
0.615653	0.610088	-1.38209				IL-6	CDI 2-SR Interpersonal Problems	[Age/sex, SSRI, SAS, BMI]
0.622183	0.927009	-0.231462				IL-6	CDI 2-SR Interpersonal Problems	[SSRI, SAS]
0.690388	0.907698	-0.297655				IL-6	CDI 2-SR Interpersonal Problems	[SAS, BMI]
0.699303	0.859775	-0.455917				IL-6	CDI 2-SR Interpersonal Problems	[SSRI, SAS, BMI]
0.804943	0.871818	0.395282				IL-6	CDI 2-SR Interpersonal Problems	[SSRI]
0.859062	0.859062	0.43209				IL-6	CDI 2-SR Interpersonal Problems	[]
0.931456	0.893647	0.338141				IL-6	CDI 2-SR Interpersonal Problems	[SSRI, BMI]
0.980683	0.877364	0.387524				IL-6	CDI 2-SR Interpersonal Problems	[BMI]
0.0497328	0.0398471	3.12798				IL-6	CDI 2-PV Total score	[BMI]
0.0562749	0.0423833	3.06985				IL-6	CDI 2-PV Total score	[SSRI, BMI]
0.0865576	0.0865576	2.59401				IL-6	CDI 2-PV Total score	[]
0.100208	0.0899258	2.54809				IL-6	CDI 2-PV Total score	[SSRI]
0.125603	0.0782166	2.7111				IL-6	CDI 2-PV Total score	[SSRI, SAS, BMI]
0.146411	0.0281715	3.58327				IL-6	CDI 2-PV Total score	[Age/sex, BMI]
0.160945	0.0352719	3.43787				IL-6	CDI 2-PV Total score	[Age/sex, SSRI, BMI]
0.183629	0.0449974	3.30216				IL-6	CDI 2-PV Total score	[Age/sex, SSRI, SAS, BMI]
0.187935	0.0660027	2.87945				IL-6	CDI 2-PV Total score	[SAS, BMI]
0.218661	0.0328446	3.54103				IL-6	CDI 2-PV Total score	[Age/sex, SAS, BMI]
0.220822	0.138436	2.29399				IL-6	CDI 2-PV Total score	[SSRI, SAS]
0.252119	0.0717092	2.97246				IL-6	CDI 2-PV Total score	[Age/sex, SSRI, SAS]
0.290437	0.0527088	3.21188				IL-6	CDI 2-PV Total score	[Age/sex, SAS]
0.292072	0.0724098	2.87769				IL-6	CDI 2-PV Total score	[Age/sex]
0.293433	0.0869447	2.73986				IL-6	CDI 2-PV Total score	[Age/sex, SSRI]
0.339865	0.118655	2.45753				IL-6	CDI 2-PV Total score	[SAS]
0.0577409	0.463047	-0.310051	0.733409	0.320412	1.67874	IL-6	CDI 2-SR_Depressed mood	[SAS, BMI]
0.0929483	0.402659	-0.38732	0.678874	0.274057	1.68165	IL-6	CDI 2-SR_Depressed mood	[Age/sex, SAS, BMI]
0.0929937	0.447844	-0.333093	0.716703	0.303242	1.69391	IL-6	CDI 2-SR_Depressed mood	[SSRI, SAS, BMI]
0.124886	0.52799	-0.25951	0.771429	0.344562	1.72713	IL-6	CDI 2-SR_Depressed mood	[Age/sex]
0.12698	0.342042	-0.474885	0.621956	0.23352	1.65652	IL-6	CDI 2-SR_Depressed mood	[Age/sex, SSRI, SAS, BMI]
0.139294	0.355407	-0.40633	0.666091	0.28137	1.57684	IL-6	CDI 2-SR_Depressed mood	[Age/sex, BMI]
0.16819	0.506937	-0.29918	0.741426	0.30642	1.79398	IL-6	CDI 2-SR_Depressed mood	[Age/sex, SAS]
0.174081	0.674085	-0.173332	0.840859	0.374882	1.88604	IL-6	CDI 2-SR_Depressed mood	[SAS]
0.211929	0.410925	-0.398498	0.671328	0.259666	1.73562	IL-6	CDI 2-SR_Depressed mood	[Age/sex, SSRI, SAS]
0.21499	0.519844	-0.263974	0.767993	0.343738	1.71588	IL-6	CDI 2-SR_Depressed mood	[Age/sex, SSRI]
0.215956	0.334523	-0.433992	0.647918	0.268364	1.56428	IL-6	CDI 2-SR_Depressed mood	[Age/sex, SSRI, BMI]
0.255746	0.637127	-0.201318	0.817653	0.354241	1.88729	IL-6	CDI 2-SR_Depressed mood	[SSRI, SAS]
0.565881	0.793293	-0.0973372	0.90725	0.438063	1.87896	IL-6	CDI 2-SR_Depressed mood	[BMI]
0.745763	0.816661	-0.0865326	0.917106	0.441283	1.906	IL-6	CDI 2-SR_Depressed mood	[SSRI, BMI]
0.937666	0.98792	-0.0055167	0.994498	0.486915	2.03121	IL-6	CDI 2-SR_Depressed mood	[SSRI]
0.981232	0.981216	-0.00853056	0.991506	0.487414	2.01694	IL-6	CDI 2-SR_Depressed mood	[]
0.18481	0.753937	0.193993	1.21409	0.360951	4.08369	IL-6	CDI 2-SR_Irritability	[SAS]
0.190337	0.616434	0.31087	1.36461	0.404339	4.60546	IL-6	CDI 2-SR_Irritability	[SSRI, SAS]
0.231578	0.665943	0.265503	1.30409	0.390688	4.35294	IL-6	CDI 2-SR_Irritability	[SSRI, SAS, BMI]
0.239789		0.135717	1.14536			IL-6	CDI 2-SR_Irritability	[SAS, BMI]
0.248449	0.890247	0.0892641	1.09337	0.307708	3.88503	IL-6	CDI 2-SR_Irritability	[Age/sex, SAS]
0.279659		0.19133	1.21086			IL-6	CDI 2-SR_Irritability	[Age/sex, SSRI, SAS]
0.315564	0.984927	0.0124547	1.01253	0.278148	3.68589	IL-6	CDI 2-SR_Irritability	[Age/sex, SAS, BMI]
0.339498	0.843135	0.130985	1.13995	0.311498	4.17174	IL-6	CDI 2-SR_Irritability	[Age/sex, SSRI, SAS, BMI]
0.471871	0.90216	-0.0732345	0.929383	0.289142	2.9873	IL-6	CDI 2-SR_Irritability	[Age/sex]
0.495275	0.669464	-0.27025	0.763189	0.220677	2.63941	IL-6	CDI 2-SR_Irritability	[Age/sex, BMI]
0.532047	0.936612	-0.0486666	0.952499	0.287064	3.16046	IL-6	CDI 2-SR_Irritability	[Age/sex, SSRI]
0.545387	0.965674	0.0232483	1.02352	0.355022	2.95079	IL-6	CDI 2-SR_Irritability	[SSRI, BMI]
0.556214	0.853567	0.102016	1.1074	0.374819	3.27182	IL-6	CDI 2-SR_Irritability	[SSRI]
0.557428	0.759589	-0.193557	0.824022	0.238536	2.84658	IL-6	CDI 2-SR_Irritability	[Age/sex, SSRI, BMI]
0.602148	0.938587	-0.0418123	0.95905	0.331055	2.77832	IL-6	CDI 2-SR_Irritability	[BMI]
0.871784	0.872577	0.0862633	1.09009	0.379879	3.12811	IL-6	CDI 2-SR_Irritability	[]
0.0405544	0.156721	-1.26187	0.283124	0.0493772	1.6234	IL-6	CDI 2-SR Anhedonia	[Age/sex, SAS, BMI]
0.0466688	0.230848	-0.79263	0.452653	0.123785	1.65524	IL-6	CDI 2-SR Anhedonia	[SAS, BMI]
0.0603396	0.207829	-1.16021	0.313421	0.0515305	1.9063	IL-6	CDI 2-SR Anhedonia	[Age/sex, SSRI, SAS, BMI]
0.0638012	0.304525	-0.681848	0.505682	0.137602	1.85836	IL-6	CDI 2-SR Anhedonia	[SSRI, SAS, BMI]
0.0841694	0.176667	-0.889832	0.410725	0.112966	1.49333	IL-6	CDI 2-SR Anhedonia	[Age/sex, BMI]
0.128754	0.220421	-0.814266	0.442965	0.120437	1.62922	IL-6	CDI 2-SR Anhedonia	[Age/sex, SSRI, BMI]
0.174795	0.437079	-0.435996	0.64662	0.215328	1.94177	IL-6	CDI 2-SR Anhedonia	[Age/sex]
0.21134	0.560625	-0.336226	0.714462	0.230229	2.21716	IL-6	CDI 2-SR Anhedonia	[SAS]
0.220679	0.49413	-0.44472	0.641004	0.179156	2.29345	IL-6	CDI 2-SR Anhedonia	[Age/sex, SAS]
0.233402	0.447798	-0.443977	0.64148	0.20386	2.01852	IL-6	CDI 2-SR Anhedonia	[Age/sex, SSRI]
0.260263	0.651772	-0.26159	0.769827	0.247177	2.3976	IL-6	CDI 2-SR Anhedonia	[SSRI, SAS]
0.277688	0.569279	-0.373656	0.688214	0.190047	2.49222	IL-6	CDI 2-SR Anhedonia	[Age/sex, SSRI, SAS]
0.286663	0.55644	-0.291049	0.747479	0.283379	1.97165	IL-6	CDI 2-SR Anhedonia	[BMI]
0.288792	0.667657	-0.211773	0.809148	0.307749	2.12745	IL-6	CDI 2-SR Anhedonia	[SSRI, BMI]
0.490811	0.838843	-0.101395	0.903576	0.340085	2.40072	IL-6	CDI 2-SR Anhedonia	[SSRI]
0.827984	0.827216	-0.105025	0.900302	0.350608	2.31182	IL-6	CDI 2-SR Anhedonia	[]
0.0368918	0.875089	0.0552701	1.05683	0.530549	2.10514	IL-6	CDI 2-SR_Hypophagia	[BMI]
0.0761501	0.924782	0.0336098	1.03418	0.514727	2.07786	IL-6	CDI 2-SR_Hypophagia	[SSRI, BMI]
0.0940051	0.75923	0.115715	1.12268	0.535656	2.353	IL-6	CDI 2-SR_Hypophagia	[Age/sex, BMI]
0.139509	0.841037	0.0773888	1.08046	0.507193	2.30168	IL-6	CDI 2-SR_Hypophagia	[Age/sex, SSRI, BMI]
0.325286	0.943885	0.0253034	1.02563	0.506985	2.07483	IL-6	CDI 2-SR_Hypophagia	[SAS, BMI]
0.393605	0.816314	0.0901808	1.09437	0.511334	2.34221	IL-6	CDI 2-SR_Hypophagia	[Age/sex, SAS, BMI]
0.398205	0.989959	-0.0045993	0.995411	0.4863	2.03751	IL-6	CDI 2-SR_Hypophagia	[SSRI, SAS, BMI]
0.446324	0.916515	0.0416221	1.0425	0.478733	2.27018	IL-6	CDI 2-SR_Hypophagia	[Age/sex, SSRI, SAS, BMI]
0.64032	0.640838	-0.150025	0.860686	0.458264	1.61649	IL-6	CDI 2-SR_Hypophagia	[]
0.73468	0.628792	-0.156681	0.854977	0.452977	1.61374	IL-6	CDI 2-SR_Hypophagia	[SSRI]
0.924818	0.576212	-0.190787	0.826308	0.423241	1.61323	IL-6	CDI 2-SR_Hypophagia	[Age/sex, SSRI]
0.945534	0.658763	-0.147298	0.863037	0.448871	1.65935	IL-6	CDI 2-SR_Hypophagia	[SAS]
0.947118	0.619689	-0.16776	0.845557	0.435927	1.6401	IL-6	CDI 2-SR_Hypophagia	[SSRI, SAS]
0.947204	0.616622	-0.168216	0.845171	0.437463	1.63286	IL-6	CDI 2-SR_Hypophagia	[Age/sex]
0.980181	0.709102	-0.133647	0.874899	0.433533	1.76561	IL-6	CDI 2-SR_Hypophagia	[Age/sex, SSRI, SAS]
0.980577	0.773045	-0.1015	0.903481	0.453251	1.80094	IL-6	CDI 2-SR_Hypophagia	[Age/sex, SAS]
0.0396945	0.695888	0.135916	1.14559	0.579492	2.26469	IL-6	CDI 2-SR_Hyperphagia	[SSRI, BMI]
0.062784	0.641811	0.160422	1.17401	0.597198	2.30793	IL-6	CDI 2-SR_Hyperphagia	[BMI]
0.0814506	0.94851	0.0237932	1.02408	0.497412	2.10839	IL-6	CDI 2-SR_Hyperphagia	[SSRI, SAS, BMI]
0.120116	0.722125	0.130948	1.13991	0.553906	2.34587	IL-6	CDI 2-SR_Hyperphagia	[Age/sex, SSRI, BMI]
0.150319	0.910233	0.0438961	1.04487	0.487145	2.24114	IL-6	CDI 2-SR_Hyperphagia	[Age/sex, SSRI, SAS, BMI]
0.173455	0.80517	0.0889246	1.093	0.539202	2.21558	IL-6	CDI 2-SR_Hyperphagia	[SAS, BMI]
0.216792	0.593562	0.194455	1.21465	0.594707	2.48084	IL-6	CDI 2-SR_Hyperphagia	[Age/sex, BMI]
0.230535	0.336182	0.319637	1.37663	0.717656	2.64069	IL-6	CDI 2-SR_Hyperphagia	[SSRI]
0.286151	0.617508	0.175254	1.19155	0.598952	2.37045	IL-6	CDI 2-SR_Hyperphagia	[SSRI, SAS]
0.300079	0.695145	0.149338	1.16107	0.550151	2.45037	IL-6	CDI 2-SR_Hyperphagia	[Age/sex, SAS, BMI]
0.328554	0.333045	0.31568	1.37119	0.723615	2.5983	IL-6	CDI 2-SR_Hyperphagia	[]
0.330038	0.619567	0.186001	1.20442	0.57793	2.51005	IL-6	CDI 2-SR_Hyperphagia	[Age/sex, SSRI, SAS]
0.359543	0.318314	0.349425	1.41825	0.714011	2.8171	IL-6	CDI 2-SR_Hyperphagia	[Age/sex, SSRI]
0.454603	0.536998	0.212824	1.23717	0.629493	2.43145	IL-6	CDI 2-SR_Hyperphagia	[SAS]
0.533557	0.478451	0.260255	1.29726	0.63166	2.66423	IL-6	CDI 2-SR_Hyperphagia	[Age/sex, SAS]
0.534617	0.28191	0.371929	1.45053	0.736736	2.85589	IL-6	CDI 2-SR_Hyperphagia	[Age/sex]
0.0415851	0.352725	0.408901	1.50516	0.635409	3.56544	IL-6	CDI 2-SR Insomnia	[Age/sex, SAS, BMI]
0.0585931	0.456151	0.33853	1.40288	0.575886	3.41749	IL-6	CDI 2-SR Insomnia	[Age/sex, SSRI, SAS, BMI]
0.0673225	0.305619	0.416437	1.51655	0.683672	3.36407	IL-6	CDI 2-SR Insomnia	[Age/sex, BMI]
0.114943	0.312099	0.410997	1.50832	0.679829	3.34647	IL-6	CDI 2-SR Insomnia	[Age/sex, SSRI, BMI]
0.143894	0.445299	0.311246	1.36512	0.613865	3.03579	IL-6	CDI 2-SR Insomnia	[Age/sex, SAS]
0.164064	0.5352	0.230582	1.25933	0.607599	2.61014	IL-6	CDI 2-SR Insomnia	[Age/sex]
0.165111	0.454791	0.290043	1.33649	0.624685	2.85935	IL-6	CDI 2-SR Insomnia	[SAS, BMI]
0.204006	0.513568	0.277317	1.31958	0.574261	3.03225	IL-6	CDI 2-SR Insomnia	[Age/sex, SSRI, SAS]
0.235233	0.509474	0.262634	1.30035	0.595889	2.83763	IL-6	CDI 2-SR Insomnia	[SSRI, SAS, BMI]
0.250361	0.589538	0.200221	1.22167	0.590279	2.52844	IL-6	CDI 2-SR Insomnia	[SAS]
0.265494	0.559709	0.216786	1.24208	0.59949	2.57345	IL-6	CDI 2-SR Insomnia	[Age/sex, SSRI]
0.352033	0.63749	0.179801	1.19698	0.566621	2.5286	IL-6	CDI 2-SR Insomnia	[SSRI, SAS]
0.565501	0.510451	0.230461	1.25918	0.6339	2.50124	IL-6	CDI 2-SR Insomnia	[BMI]
0.63463	0.636782	0.159082	1.17243	0.605793	2.2691	IL-6	CDI 2-SR Insomnia	[]
0.763948	0.511691	0.229925	1.25851	0.633296	2.50094	IL-6	CDI 2-SR Insomnia	[SSRI, BMI]
0.883664	0.639266	0.157808	1.17094	0.605282	2.26523	IL-6	CDI 2-SR Insomnia	[SSRI]
0.428737	0.711807	0.124715	1.13283	0.584531	2.19543	IL-6	CDI 2-SR_Hypersomnia	[BMI]
0.446386	0.772756	0.0988095	1.10386	0.564488	2.15859	IL-6	CDI 2-SR_Hypersomnia	[SSRI, BMI]
0.580036	0.951949	0.0199578	1.02016	0.533028	1.95247	IL-6	CDI 2-SR_Hypersomnia	[SSRI]
0.669049	0.652045	0.165937	1.1805	0.57389	2.4283	IL-6	CDI 2-SR_Hypersomnia	[Age/sex, SSRI, BMI]
0.678718	0.560326	0.210675	1.23451	0.607522	2.50858	IL-6	CDI 2-SR_Hypersomnia	[Age/sex, BMI]
0.718092	0.580164	0.19538	1.21577	0.608406	2.42947	IL-6	CDI 2-SR_Hypersomnia	[SAS, BMI]
0.739686	0.672637	0.151802	1.16393	0.575597	2.35361	IL-6	CDI 2-SR_Hypersomnia	[SSRI, SAS, BMI]
0.836552	0.738352	0.114402	1.1212	0.573009	2.19385	IL-6	CDI 2-SR_Hypersomnia	[SAS]
0.839283	0.815513	0.0814	1.0848	0.547503	2.1494	IL-6	CDI 2-SR_Hypersomnia	[SSRI, SAS]
0.861925	0.698526	0.149966	1.16179	0.543934	2.48149	IL-6	CDI 2-SR_Hypersomnia	[Age/sex, SSRI, SAS, BMI]
0.8638	0.560406	0.218719	1.24448	0.595981	2.59863	IL-6	CDI 2-SR_Hypersomnia	[Age/sex, SAS, BMI]
0.883175	0.907662	0.0402504	1.04107	0.527345	2.05526	IL-6	CDI 2-SR_Hypersomnia	[Age/sex, SSRI]
0.933917	0.933872	0.0270019	1.02737	0.542904	1.94415	IL-6	CDI 2-SR_Hypersomnia	[]
0.946911	0.821449	0.0837547	1.08736	0.525385	2.25046	IL-6	CDI 2-SR_Hypersomnia	[Age/sex, SSRI, SAS]
0.952155	0.70888	0.134554	1.14403	0.564514	2.31845	IL-6	CDI 2-SR_Hypersomnia	[Age/sex, SAS]
0.983775	0.850677	0.0639786	1.06607	0.547651	2.07523	IL-6	CDI 2-SR_Hypersomnia	[Age/sex]
0.4168	0.416333	-0.291208	0.747361	0.370309	1.50833	IL-6	CDI 2-SR Tiredness	[]
0.547155	0.251756	-0.451864	0.636441	0.293873	1.37834	IL-6	CDI 2-SR Tiredness	[Age/sex, SSRI]
0.556932	0.406826	-0.299062	0.741514	0.365789	1.50317	IL-6	CDI 2-SR Tiredness	[SSRI]
0.569509	0.501214	-0.247458	0.780783	0.379624	1.60586	IL-6	CDI 2-SR Tiredness	[BMI]
0.5736	0.283135	-0.413605	0.661262	0.310711	1.40731	IL-6	CDI 2-SR Tiredness	[Age/sex]
0.611395	0.355423	-0.380559	0.683479	0.304926	1.53199	IL-6	CDI 2-SR Tiredness	[Age/sex, SSRI, BMI]
0.630277	0.38826	-0.344434	0.708621	0.324042	1.54963	IL-6	CDI 2-SR Tiredness	[Age/sex, BMI]
0.660995	0.493432	-0.254852	0.775031	0.373739	1.6072	IL-6	CDI 2-SR Tiredness	[SSRI, BMI]
0.705744	0.392057	-0.327111	0.721004	0.340894	1.52495	IL-6	CDI 2-SR Tiredness	[SAS]
0.736387	0.36863	-0.351711	0.703484	0.326783	1.51443	IL-6	CDI 2-SR Tiredness	[SSRI, SAS]
0.77489	0.282831	-0.458636	0.632145	0.273727	1.45988	IL-6	CDI 2-SR Tiredness	[Age/sex, SSRI, SAS]
0.793347	0.324342	-0.404285	0.667454	0.298714	1.49137	IL-6	CDI 2-SR Tiredness	[Age/sex, SAS]
0.803925	0.424185	-0.310228	0.73328	0.342649	1.56924	IL-6	CDI 2-SR Tiredness	[SAS, BMI]
0.815582	0.335472	-0.418472	0.658052	0.28082	1.54203	IL-6	CDI 2-SR Tiredness	[Age/sex, SSRI, SAS, BMI]
0.822831	0.397877	-0.336066	0.714576	0.327857	1.55744	IL-6	CDI 2-SR Tiredness	[SSRI, SAS, BMI]
0.832756	0.377368	-0.367524	0.692447	0.306196	1.56593	IL-6	CDI 2-SR Tiredness	[Age/sex, SAS, BMI]
0.0689364	0.182455	-0.602004	0.547713	0.22605	1.32709	IL-6	CDI 2-SR_Self-hatred	[Age/sex]
0.111817	0.147945	-0.692857	0.500145	0.195647	1.27855	IL-6	CDI 2-SR_Self-hatred	[Age/sex, BMI]
0.120146	0.178216	-0.603504	0.546892	0.227157	1.31667	IL-6	CDI 2-SR_Self-hatred	[Age/sex, SSRI]
0.147388	0.191261	-0.693005	0.500071	0.17687	1.41387	IL-6	CDI 2-SR_Self-hatred	[Age/sex, SAS, BMI]
0.155688	0.263836	-0.552485	0.575518	0.218364	1.51683	IL-6	CDI 2-SR_Self-hatred	[Age/sex, SAS]
0.166829	0.137613	-0.720791	0.486367	0.187817	1.25949	IL-6	CDI 2-SR_Self-hatred	[Age/sex, SSRI, BMI]
0.20772	0.191289	-0.696273	0.498439	0.175419	1.41628	IL-6	CDI 2-SR_Self-hatred	[Age/sex, SSRI, SAS, BMI]
0.223665	0.264051	-0.552793	0.575341	0.218084	1.51784	IL-6	CDI 2-SR_Self-hatred	[Age/sex, SSRI, SAS]
0.312916	0.503787	-0.284291	0.752548	0.327017	1.7318	IL-6	CDI 2-SR_Self-hatred	[SAS, BMI]
0.41643	0.50655	-0.281731	0.754477	0.328553	1.73255	IL-6	CDI 2-SR_Self-hatred	[SSRI, SAS, BMI]
0.433245	0.664974	-0.181237	0.834238	0.36733	1.89463	IL-6	CDI 2-SR_Self-hatred	[SAS]
0.550256	0.659454	-0.183648	0.832229	0.367709	1.88357	IL-6	CDI 2-SR_Self-hatred	[SSRI, SAS]
0.561629	0.560209	-0.219934	0.802572	0.382925	1.68211	IL-6	CDI 2-SR_Self-hatred	[]
0.775634	0.512372	-0.251716	0.777466	0.366133	1.65091	IL-6	CDI 2-SR_Self-hatred	[BMI]
0.837728	0.561555	-0.219546	0.802883	0.3826	1.68484	IL-6	CDI 2-SR_Self-hatred	[SSRI]
0.91491	0.515945	-0.249906	0.778874	0.366444	1.65549	IL-6	CDI 2-SR_Self-hatred	[SSRI, BMI]
0.132359	0.794047	-0.098517	0.90618	0.432507	1.89861	IL-6	CDI 2-SR Guilty	[SAS]
0.161473	0.549805	-0.241978	0.785073	0.355226	1.73506	IL-6	CDI 2-SR Guilty	[Age/sex, SAS]
0.186246	0.861124	-0.0674619	0.934763	0.438996	1.99041	IL-6	CDI 2-SR Guilty	[SAS, BMI]
0.186404	0.798196	-0.0963417	0.908154	0.433936	1.90061	IL-6	CDI 2-SR Guilty	[SSRI, SAS]
0.18768	0.669189	-0.177104	0.837692	0.371751	1.88763	IL-6	CDI 2-SR Guilty	[Age/sex, SAS, BMI]
0.224938	0.555998	-0.238197	0.788047	0.356615	1.74143	IL-6	CDI 2-SR Guilty	[Age/sex, SSRI, SAS]
0.243139	0.866013	-0.0648879	0.937172	0.441028	1.99147	IL-6	CDI 2-SR Guilty	[SSRI, SAS, BMI]
0.250564	0.671118	-0.1755	0.839038	0.373221	1.88624	IL-6	CDI 2-SR Guilty	[Age/sex, SSRI, SAS, BMI]
0.276618	0.541433	-0.228285	0.795897	0.38251	1.65604	IL-6	CDI 2-SR Guilty	[Age/sex]
0.320631	0.730622	-0.134876	0.873824	0.405484	1.8831	IL-6	CDI 2-SR Guilty	[Age/sex, BMI]
0.41616	0.550633	-0.224058	0.799269	0.38294	1.66823	IL-6	CDI 2-SR Guilty	[Age/sex, SSRI]
0.443952	0.735695	-0.132179	0.876184	0.406714	1.88757	IL-6	CDI 2-SR Guilty	[Age/sex, SSRI, BMI]
0.61205	0.878263	0.0542294	1.05573	0.52746	2.11307	IL-6	CDI 2-SR Guilty	[BMI]
0.687972	0.880343	0.0534212	1.05487	0.526174	2.11481	IL-6	CDI 2-SR Guilty	[SSRI, BMI]
0.802874	0.973389	-0.011495	0.988571	0.503142	1.94234	IL-6	CDI 2-SR Guilty	[SSRI]
0.961625	0.961607	-0.0164141	0.98372	0.504221	1.91921	IL-6	CDI 2-SR Guilty	[]
0.126685	0.342408	0.497823	1.64514	0.588679	4.59753	IL-6	CDI 2-SR Difficulties in concentration	[Age/sex, SSRI]
0.165323	0.266616	0.583345	1.79202	0.640271	5.0156	IL-6	CDI 2-SR Difficulties in concentration	[Age/sex]
0.184988	0.501846	0.380595	1.46315	0.481845	4.44297	IL-6	CDI 2-SR Difficulties in concentration	[Age/sex, SSRI, BMI]
0.24805	0.33692	0.514696	1.67313	0.585184	4.78373	IL-6	CDI 2-SR Difficulties in concentration	[Age/sex, BMI]
0.309714	0.361805	0.413363	1.51189	0.62185	3.67584	IL-6	CDI 2-SR Difficulties in concentration	[SSRI]
0.328486	0.347216	0.428106	1.53435	0.628436	3.74617	IL-6	CDI 2-SR Difficulties in concentration	[]
0.344524	0.574028	0.264861	1.30325	0.517562	3.28166	IL-6	CDI 2-SR Difficulties in concentration	[SSRI, BMI]
0.362935	0.621364	0.285924	1.33099	0.42798	4.13931	IL-6	CDI 2-SR Difficulties in concentration	[Age/sex, SSRI, SAS]
0.388339	0.48313	0.321972	1.37985	0.56108	3.39341	IL-6	CDI 2-SR Difficulties in concentration	[BMI]
0.454318	0.652554	0.263827	1.3019	0.412834	4.10564	IL-6	CDI 2-SR Difficulties in concentration	[Age/sex, SSRI, SAS, BMI]
0.478196	0.351498	0.502148	1.65227	0.574528	4.7517	IL-6	CDI 2-SR Difficulties in concentration	[Age/sex, SAS]
0.571474	0.381289	0.474879	1.60782	0.555329	4.65506	IL-6	CDI 2-SR Difficulties in concentration	[Age/sex, SAS, BMI]
0.600603	0.550002	0.299698	1.34945	0.505114	3.60517	IL-6	CDI 2-SR Difficulties in concentration	[SSRI, SAS]
0.664371	0.376598	0.424447	1.52875	0.596651	3.91697	IL-6	CDI 2-SR Difficulties in concentration	[SAS]
0.678886	0.610214	0.256006	1.29176	0.482735	3.45665	IL-6	CDI 2-SR Difficulties in concentration	[SSRI, SAS, BMI]
0.731608	0.436614	0.373853	1.45332	0.566622	3.72761	IL-6	CDI 2-SR Difficulties in concentration	[SAS, BMI]
0.0605274	0.0839374	-0.862249	0.422212	0.158804	1.12253	IL-6	CDI 2-SR Indeciseveness	[SSRI, SAS]
0.0740483	0.113724	-0.799532	0.449539	0.166912	1.21073	IL-6	CDI 2-SR Indeciseveness	[SSRI, SAS, BMI]
0.111789	0.163771	-0.746414	0.474063	0.165795	1.3555	IL-6	CDI 2-SR Indeciseveness	[Age/sex, SSRI, SAS]
0.112393		-0.69202	0.500564			IL-6	CDI 2-SR Indeciseveness	[Age/sex, SSRI, SAS, BMI]
0.112484	0.185935	-0.56882	0.566193	0.24373	1.31528	IL-6	CDI 2-SR Indeciseveness	[SAS]
0.141168	0.242442	-0.512501	0.598996	0.25364	1.41459	IL-6	CDI 2-SR Indeciseveness	[SAS, BMI]
0.163194	0.351804	-0.425792	0.653252	0.266578	1.6008	IL-6	CDI 2-SR Indeciseveness	[Age/sex, SAS]
0.176381	0.418526	-0.37717	0.6858	0.275007	1.71022	IL-6	CDI 2-SR Indeciseveness	[Age/sex, SAS, BMI]
0.296438	0.296942	-0.394694	0.673886	0.32098	1.4148	IL-6	CDI 2-SR Indeciseveness	[]
0.363422	0.286316	-0.409135	0.664224	0.313107	1.40908	IL-6	CDI 2-SR Indeciseveness	[SSRI]
0.56422	0.307443	-0.399946	0.670357	0.310988	1.445	IL-6	CDI 2-SR Indeciseveness	[SSRI, BMI]
0.569603	0.320557	-0.382381	0.682235	0.320819	1.4508	IL-6	CDI 2-SR Indeciseveness	[BMI]
0.675118	0.310663	-0.407803	0.66511	0.302347	1.46312	IL-6	CDI 2-SR Indeciseveness	[Age/sex, SSRI]
0.723502	0.350995	-0.369442	0.69112	0.317965	1.5022	IL-6	CDI 2-SR Indeciseveness	[Age/sex]
0.785672	0.368068	-0.374888	0.687366	0.303854	1.55493	IL-6	CDI 2-SR Indeciseveness	[Age/sex, SSRI, BMI]
0.829678	0.408826	-0.335867	0.714718	0.32211	1.58586	IL-6	CDI 2-SR Indeciseveness	[Age/sex, BMI]
0.274527	0.618893	0.211921	1.23605	0.536278	2.84893	IL-6	CDI 2-SR_Suicidal ideation	[Age/sex]
0.411741	0.684223	0.179247	1.19632	0.50431	2.83788	IL-6	CDI 2-SR_Suicidal ideation	[Age/sex, BMI]
0.42029	0.628156	0.206917	1.22988	0.53236	2.84132	IL-6	CDI 2-SR_Suicidal ideation	[Age/sex, SSRI]
0.4624	0.470741	0.28167	1.32534	0.61648	2.84929	IL-6	CDI 2-SR_Suicidal ideation	[]
0.553296	0.697431	0.172696	1.1885	0.497632	2.83853	IL-6	CDI 2-SR_Suicidal ideation	[Age/sex, SSRI, BMI]
0.605341	0.485022	0.323937	1.38256	0.556914	3.43226	IL-6	CDI 2-SR_Suicidal ideation	[Age/sex, SAS]
0.630606	0.555783	0.277433	1.31974	0.524361	3.32159	IL-6	CDI 2-SR_Suicidal ideation	[Age/sex, SAS, BMI]
0.636464	0.564917	0.228513	1.25673	0.577149	2.7365	IL-6	CDI 2-SR_Suicidal ideation	[BMI]
0.671867	0.585519	0.230986	1.25984	0.549261	2.8897	IL-6	CDI 2-SR_Suicidal ideation	[SAS, BMI]
0.7076	0.491758	0.319918	1.37702	0.553163	3.42787	IL-6	CDI 2-SR_Suicidal ideation	[Age/sex, SSRI, SAS]
0.724312	0.567009	0.272143	1.31277	0.517056	3.33306	IL-6	CDI 2-SR_Suicidal ideation	[Age/sex, SSRI, SAS, BMI]
0.734621	0.46549	0.286595	1.33189	0.616898	2.87555	IL-6	CDI 2-SR_Suicidal ideation	[SSRI]
0.772716	0.575425	0.238811	1.26974	0.55052	2.92857	IL-6	CDI 2-SR_Suicidal ideation	[SSRI, SAS, BMI]
0.78591	0.461327	0.307482	1.36	0.600133	3.08197	IL-6	CDI 2-SR_Suicidal ideation	[SAS]
0.806403	0.55186	0.237095	1.26756	0.580456	2.76802	IL-6	CDI 2-SR_Suicidal ideation	[SSRI, BMI]
0.872087	0.455721	0.312154	1.36637	0.601658	3.10302	IL-6	CDI 2-SR_Suicidal ideation	[SSRI, SAS]
